# Supplementary material for: In community-dwelling women frailty is associated with imminent risk of osteoporotic fractures
Source: PubMed Central journal article supplement — Osteoporos Int. 2021 Mar 4;32(9):1735–44. doi: 10.1007/s00198-021-05886-7 (PMC8387253; doi:10.1007/s00198-021-05886-7), 2021-03-04
Supplement: 198_2021_5886_MOESM2_ESM.pdf [file 198_2021_5886_MOESM2_ESM.pdf]

**Supplementary Fig. 1** Distribution of fracture types at the end of the study (October 2012) based on frailty status at age 75

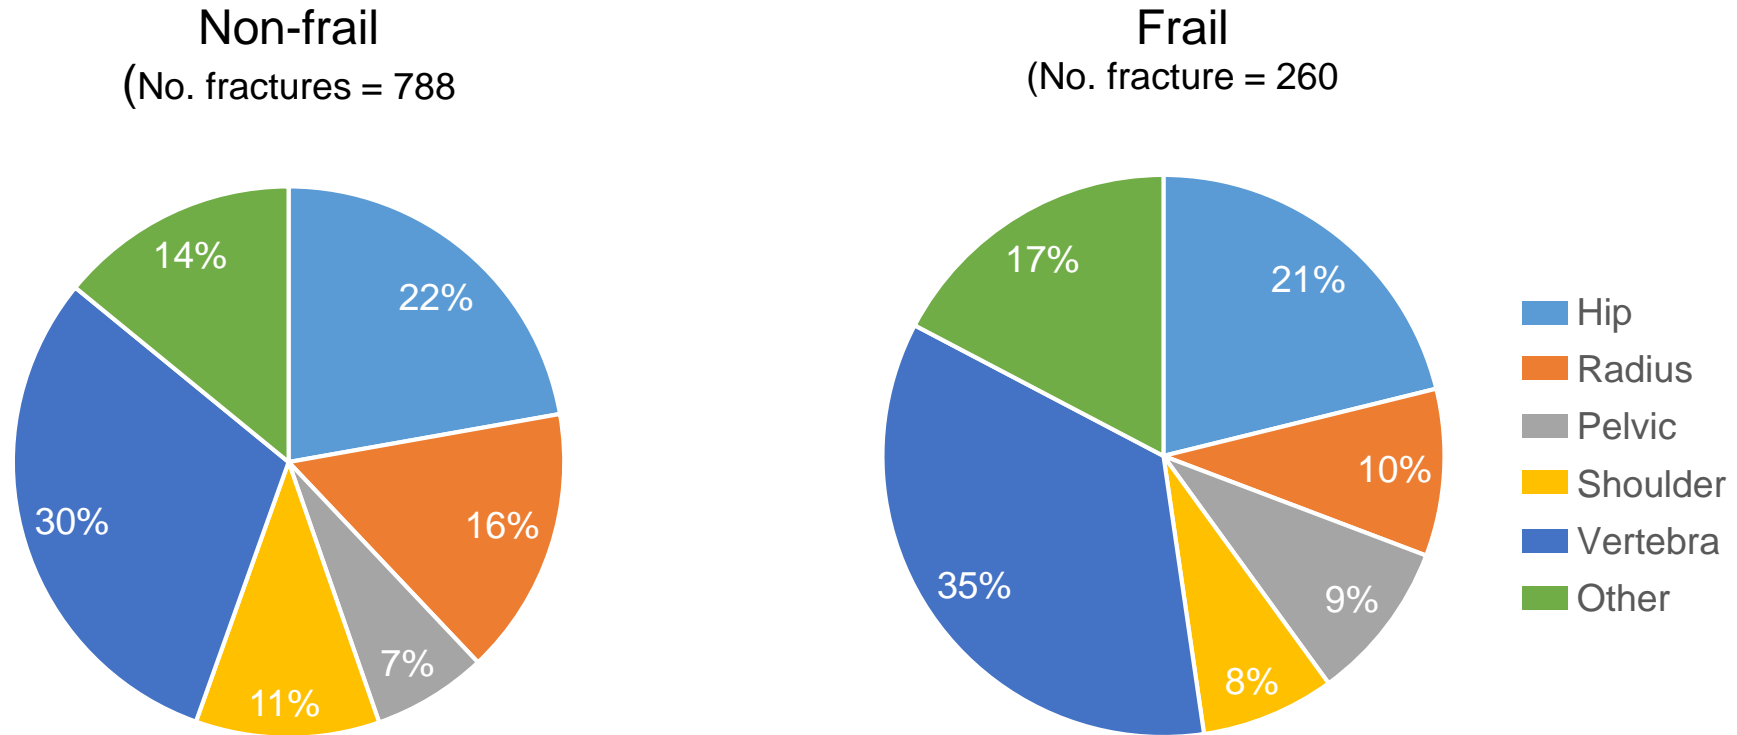

Each segment represent the percentage of the total number of fractures (n = 1048). Multiple fractures in the same woman are included in the calculations.

**Title: In community-dwelling women frailty is associated with imminent risk of osteoporotic fractures**

Osteoporosis International

Patrik Bartosch<sup>1</sup>, Linnea Malmgren<sup>1,2</sup>, Jimmie Kristensson<sup>3,4</sup>, Fiona E McGuigan<sup>1</sup>, Kristina E Akesson<sup>1</sup>

***Affiliation of authors***

<sup>1</sup>Lund University, Department of Clinical Sciences Malmö, Clinical and Molecular Osteoporosis Research Unit; Skåne University Hospital, Department of Orthopaedics, Malmö, Sweden

<sup>2</sup>Skåne University Hospital, Department of Geriatrics, Malmö, Sweden

<sup>3</sup>Lund University, Department of Health Sciences, Proactive an integrated care research unit

<sup>4</sup>Lund University & Region of Skåne, Institute for Palliative Care

***Corresponding author:***

Professor Kristina Åkesson, MD, PhD Email: [kristina.akesson@med.lu.se](mailto:kristina.akesson@med.lu.se)
