# Supplementary material for: In community-dwelling women frailty is associated with imminent risk of osteoporotic fractures
Source: PubMed Central journal article supplement — Osteoporos Int. 2021 Mar 4;32(9):1735–44. doi: 10.1007/s00198-021-05886-7 (PMC8387253; doi:10.1007/s00198-021-05886-7), 2021-03-04
Supplement: 198_2021_5886_MOESM3_ESM.pdf [file 198_2021_5886_MOESM3_ESM.pdf]

### Electronic Supplementary Material 3

**Table** Number of *women* with incident fractures. Number of *fractures* and incidence rate stratified by frailty status at age 75 and calculated after 1- and 2 years

|                                               | No. of <i>women</i> with at least one fracture <sup>a</sup> |               |         | No. of <i>fractures</i> <sup>b</sup>          |                                               | Incidence rate ratio |
|-----------------------------------------------|-------------------------------------------------------------|---------------|---------|-----------------------------------------------|-----------------------------------------------|----------------------|
|                                               | Non-frail                                                   | Frail         | P-value | Non-frail                                     | Frail                                         |                      |
| <b>Frailty status at age 75</b>               | <i>n</i> =799                                               | <i>n</i> =245 |         |                                               |                                               |                      |
| <i>Fractures in the 1-year between 75-76</i>  | N° (%)                                                      | N° (%)        |         | N° (fractures/1000 person-years) <sup>c</sup> | N° (fractures/1000 person-years) <sup>c</sup> | IRR <sup>d</sup>     |
| Any <sup>1</sup>                              | 36 (4.5)                                                    | 17 (6.9)      | 0.129   | 42 (52.9)                                     | 22 (91.9)                                     | 1.74 (0.99-2.98)     |
| Major osteoporotic <sup>3</sup>               | 27 (3.4)                                                    | 14 (5.7)      | 0.100   | 35 (44.1)                                     | 18 (75.2)                                     | 1.71 (0.91-3.09)     |
| Hip                                           | 5 (0.6)                                                     | 6 (2.4)       | 0.014   | 5 (6.3)                                       | 6 (25.0)                                      | 3.98(1.01-16.48)     |
| Vertebral <sup>4</sup>                        | 11 (1.4)                                                    | 4 (1.6)       | 0.769   | 14 (17.6)                                     | 7 (29.2)                                      | 1.66 (0.57-4.39)     |
| <i>Fractures in the 2-years between 75-77</i> | N° (%)                                                      | N° (%)        |         | N° (fractures/1000 person-years) <sup>c</sup> | N° (fractures/1000 person-years) <sup>c</sup> | IRR                  |
| Any                                           | 63 (7.9)                                                    | 31 (13.1)     | 0.014   | 72 (45.6)                                     | 42 (82.2)                                     | 1.80 (1.20-2.67)     |
| Major osteoporotic                            | 46 (5.8)                                                    | 26 (10.6)     | 0.009   | 54 (34.2)                                     | 36 (70.5)                                     | 2.05 (1.31-3.20)     |
| Hip                                           | 12 (1.5)                                                    | 11 (4.5)      | 0.005   | 12 (7.6)                                      | 11 (21.5)                                     | 2.83(1.13-7.01)      |
| Vertebral                                     | 14 (1.8)                                                    | 8 (3.3)       | 0.149   | 18 (11.4)                                     | 14 (27.4)                                     | 2.40 (1.11-5.11)     |
| Frailty Index (mean, SD)                      | 0.14 (0.05)                                                 | 0.36 (0.10)   |         |                                               |                                               |                      |

<sup>a</sup>First fracture used as endpoint. A woman could be included in multiple categories if fractures at different sites were sustained during the follow-up. <sup>b</sup>Multiple fractures in the same woman are included in the count. <sup>c</sup>Incidence rate (IR). <sup>d</sup>Incidence Rate Ratio (reference non-frail).

Title: **In community-dwelling women frailty is associated with imminent risk of osteoporotic fractures**

Osteoporosis International

Patrik Bartosch<sup>1</sup>, Linnea Malmgren<sup>1,2</sup>, Jimmie Kristensson<sup>3,4</sup>, Fiona E McGuigan<sup>1</sup>, Kristina E Akesson<sup>1</sup>

***Affiliation of authors***

<sup>1</sup>Lund University, Department of Clinical Sciences Malmö, Clinical and Molecular Osteoporosis Research Unit; Skåne University Hospital, Department of Orthopaedics, Malmö, Sweden

<sup>2</sup>Skåne University Hospital, Department of Geriatrics, Malmö, Sweden

<sup>3</sup>Lund University, Department of Health Sciences, Proactive an integrated care research unit

<sup>4</sup>Lund University & Region of Skåne, Institute for Palliative Care

***Corresponding author:***

Professor Kristina Åkesson, MD, PhD

Email: [kristina.akesson@med.lu.se](mailto:kristina.akesson@med.lu.se)
